# Supplementary material for: The pathway ontology – updates and applications
Source: Springer Nature journal article supplement (doi:10.1186/2041-1480-5-7), 2014-01-01

A

| Parent Terms | Term With Siblings                                                                                                                                                                                                                                                                                            | Child Terms                                                                                                                                                                                                                                                                                                                                                                                                                                                               |
|--------------|---------------------------------------------------------------------------------------------------------------------------------------------------------------------------------------------------------------------------------------------------------------------------------------------------------------|---------------------------------------------------------------------------------------------------------------------------------------------------------------------------------------------------------------------------------------------------------------------------------------------------------------------------------------------------------------------------------------------------------------------------------------------------------------------------|
|              | <p>pathway + <a href="#">A</a> <a href="#">D</a></p> <p>A pathway is a set of inter-connected reactions and interactions whose delineation and scope are used as a model for exploring and studying, describing and understanding the working of and relationships between biomolecules within a context.</p> | <ul style="list-style-type: none"> <li><a href="#">I</a> classic metabolic pathway + <a href="#">A</a> <a href="#">D</a></li> <li><a href="#">I</a> disease pathway + <a href="#">A</a> <a href="#">D</a></li> <li><a href="#">I</a> drug pathway + <a href="#">A</a> <a href="#">D</a></li> <li><a href="#">I</a> regulatory pathway + <a href="#">A</a> <a href="#">D</a></li> <li><a href="#">I</a> signaling pathway + <a href="#">A</a> <a href="#">D</a></li> </ul> |

B

| Parent Terms                                                    | Term With Siblings                                                                                                                                                                                                                                                                                                                                                                                                                                                                                                                                                                                                                                                             | Child Terms                                                                                                                                                                                                                                                                                                                      |
|-----------------------------------------------------------------|--------------------------------------------------------------------------------------------------------------------------------------------------------------------------------------------------------------------------------------------------------------------------------------------------------------------------------------------------------------------------------------------------------------------------------------------------------------------------------------------------------------------------------------------------------------------------------------------------------------------------------------------------------------------------------|----------------------------------------------------------------------------------------------------------------------------------------------------------------------------------------------------------------------------------------------------------------------------------------------------------------------------------|
| hormone signaling pathway + <a href="#">A</a> <a href="#">D</a> | <p>altered hormone signaling pathway + <a href="#">A</a> <a href="#">D</a></p> <p>amine and amino acid-derived hormone signaling pathway + <a href="#">A</a> <a href="#">D</a></p> <p>lipid hormone signaling pathway + <a href="#">A</a> <a href="#">D</a></p> <p>The main categories of lipid hormones are the eicosanoids derived from arachidonic acid metabolism and the cholesterol derived steroid hormones. The signaling they initiate plays important roles in metabolism, inflammation and immunity, in the cardiovascular, nervous, renal and reproductive systems.</p> <p>peptide and protein hormone signaling pathway + <a href="#">A</a> <a href="#">D</a></p> | <ul style="list-style-type: none"> <li><a href="#">I</a> altered lipid hormone signaling pathway + <a href="#">A</a> <a href="#">D</a></li> <li><a href="#">I</a> eicosanoid signaling pathway + <a href="#">A</a></li> <li><a href="#">I</a> steroid hormone signaling pathway + <a href="#">A</a> <a href="#">D</a></li> </ul> |

C

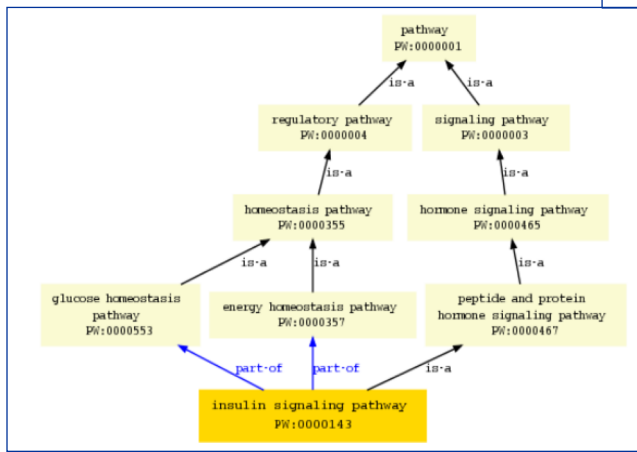

Supplement: 13326_2013_155_MOESM1_ESM.pdf [file 13326_2013_155_MOESM1_ESM.pdf]
