# Supplementary material for: The pathway ontology – updates and applications
Source: Springer Nature journal article supplement (doi:10.1186/2041-1480-5-7), 2014-01-01
Supplement: 13326_2013_155_MOESM2_ESM.pdf [file 13326_2013_155_MOESM2_ESM.pdf]

## Entities

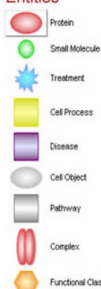

## View Ontology Report

## Description

Pancreatic cancer, of which pancreatic ductal adenocarcinoma (PDAC) represents ~85% of all pancreatic tumors, is a common form of cancer in the Western world with more than 37,000 people diagnosed annually in the United States. While ranking relatively low in terms of frequency, it ranks fourth in terms of cancer mortality due to its very aggressive nature and both men and women appear to be at equal risk. Among the better or well-characterized precursor lesions for PDAC are the pancreatic intra\_([more])

## Pathway Diagram:

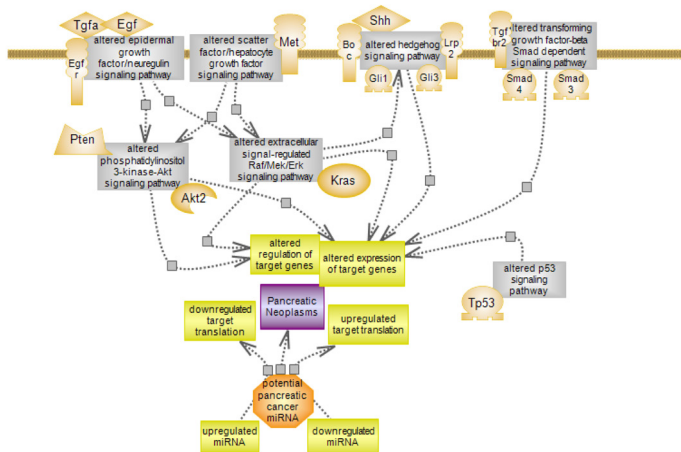

## Relationships

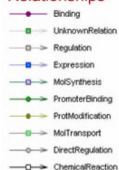

## Shapes

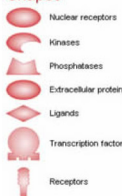

## GO TO:

- [Genes](#)
- [Disease annotations to Pathway Genes](#)
- [Pathway annotations to Pathway Genes](#)
- [Phenotype annotations to Pathway Genes](#)
- [References](#)
- [Ontology path Diagram](#)
