# Supplementary material for: The pathway ontology – updates and applications
Source: Springer Nature journal article supplement (doi:10.1186/2041-1480-5-7), 2014-01-01
Supplement: 13326_2013_155_MOESM4_ESM.pdf [file 13326_2013_155_MOESM4_ESM.pdf]

## Entities

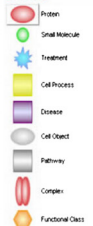

## View Ontology Report

## Description

Tetrahydrofolates (THF) are soluble forms of vitamin B9 that play essential roles in a number of metabolic pathways by mediating the transfer of 1-carbon (1C) units for the de novo synthesis of purines and thymidylates and for the re-methylation of homocysteine (Hcy) to methionine (Met). Humans cannot synthesize folate and must derive it from diet or as a supplement in the form of folic acid (FA). The folate/FA consist of three moieties: a pterin (pteridine) ring, a para aminobenzoic group (PABA\_<more>

## Pathway Diagram:

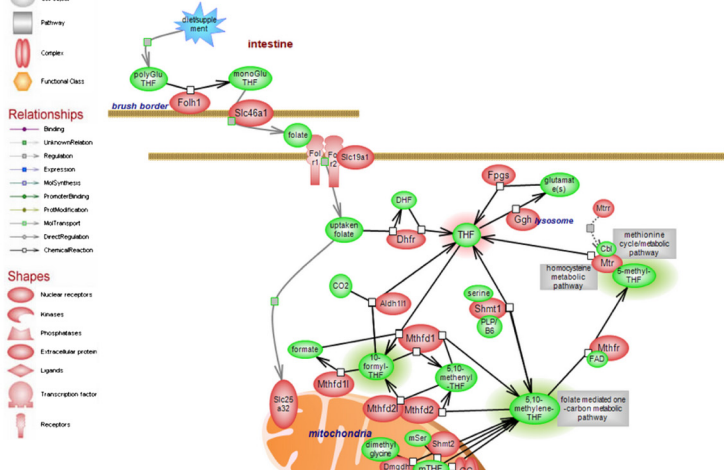

## Relationships

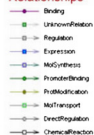

## Shapes

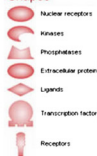

Rat Mouse Human  show annotations for term's descendants Sort by: symbol

## folate cycle metabolic pathway

| Symbol  | Object Name                                                                                                                           |
|---------|---------------------------------------------------------------------------------------------------------------------------------------|
| Aldh1f1 | aldehyde dehydrogenase 1 family                                                                                                       |
| Amt     | aminomethyltransferase                                                                                                                |
| Dhfr    | dihydrofolate reductase                                                                                                               |
| Did     | dihydroliipoamide dehydrogenase                                                                                                       |
| Dmghd   | dimethylglycine dehydrogenase                                                                                                         |
| Folh1   | folate hydrolase 1                                                                                                                    |
| Folh1   | folate hydrolase 1                                                                                                                    |
| Folr1   | folate receptor 1 (adult)                                                                                                             |
| Folr2   | folate receptor 2 (fetal)                                                                                                             |
| Fqgs    | folylpolylglutamate synthase                                                                                                          |
| Gcsh    | glycine cleavage system protein H (aminomethyl carrier)                                                                               |
| Ggh     | gamma-glutamyl hydrolase (conjugase, folylpolyglutamylamyl hydrolase)                                                                 |
| Gldc    | glycine dehydrogenase (decarboxylating)                                                                                               |
| Mthfd1  | methylene tetrahydrofolate dehydrogenase (NADP+ dependent) methenyltetrahydrofolate cyclohydrolase, formyltetrahydrofolate synthetase |
| Mthfd1l | methylene tetrahydrofolate dehydrogenase (NADP+ dependent) 1-like                                                                     |
| Mthfd2  | methylene tetrahydrofolate dehydrogenase (NADP+ dependent) methenyltetrahydrofolate cyclohydrolase                                    |

## Disease Annotations Associated with Genes in the folate cycle metabolic pathway

| Diseases/Genes               | Genes/Diseases   |
|------------------------------|------------------|
| Disease Terms                | Gene Symbols     |
| Amotrophic Lateral Sclerosis | Folh1            |
| Aortic Coarctation           | Mthfr            |
| Pancreatic Neoplasms         | Mtr, Mtrr, Mthfr |
| Osteosarcoma                 | Mthfr            |
| Metabolism, Inborn Errors    | Dhfr, Mthfd1     |
| Carcinoma, Renal Cell        |                  |
| Renal Insufficiency          |                  |
| Hyperhomocysteinemia         |                  |
| Leish Disease                |                  |
| Diabetes Mellitus, Type 2    |                  |
| Cholangiocarcinoma           |                  |
| Liver Neoplasms              |                  |
| Neural Tube Defects          |                  |
| Maple Syrup Urine Disease    |                  |
| Hypothyroidism               |                  |

## Pathway Annotations Associated with Genes in the folate cycle metabolic pathway

| Pathways/Genes                                                        | Genes/Pathways                                                                                                      |
|-----------------------------------------------------------------------|---------------------------------------------------------------------------------------------------------------------|
| Pathway Terms                                                         | Gene Symbols                                                                                                        |
| glycolysis/gluconeogenesis pathway                                    | Did                                                                                                                 |
| citric acid cycle pathway                                             | Did                                                                                                                 |
| pyrimidine metabolic pathway                                          | Dhfr                                                                                                                |
| pyruvate metabolic pathway                                            | Did                                                                                                                 |
| glycine, serine and threonine metabolic pathway                       | Dmghd, SarcH, Did, Shmt2, Gldc, Shmt1, Amt                                                                          |
| methionine cycle/metabolic pathway                                    | Mtr, Mtrr, Mthfr                                                                                                    |
| valine, leucine and isoleucine degradation pathway                    | Did                                                                                                                 |
| cyranamino acid metabolic pathway                                     | Shmt2, Shmt1                                                                                                        |
| selenoamino acid metabolic pathway                                    | Mtr                                                                                                                 |
| folate metabolic pathway                                              | Dhfr, Ggh, Slc19a1, Folh1, Folr1, Dmghd, SarcH, Mtr, Aldh1f1, Mthfd1, Folr2, Shmt2, Mtr, Mthfr, Mthfd2, Shmt1, Fqgs |
| folate mediated one-carbon metabolic pathway                          | Dhfr, Ggh, Folh1, Dmghd, SarcH, Mtr, Aldh1f1, Mthfd1, Mthfd1l, Shmt2, Mtr, Mthfr, Mthfd2, Mthfd2, Shmt1, Amt        |
| endocytosis pathway                                                   | Folr1, Folr2                                                                                                        |
| homocysteine metabolic pathway                                        | Mthfr                                                                                                               |
| remethylation pathway of homocysteine metabolism -cobalamin dependent | Mtr, Mtrr, Mthfr                                                                                                    |
| glycine metabolic pathway                                             | Shmt2, Shmt1                                                                                                        |
| glycolysis pathway                                                    | Did                                                                                                                 |
